# Supplementary material for: Biophysicochemical Motifs in T-cell Receptor Sequences Distinguish Repertoires from Tumor-Infiltrating Lymphocyte and Adjacent Healthy Tissue
Source: Oxford University Press journal article supplement (doi:10.1158/0008-5472.can-18-2292), 2019-01-08
Supplement: 00085472can182292-sup-205861_2_supp_5220339_pkg997.xlsx [file 00085472can182292-sup-205861_2_supp_5220339_pkg997.xlsx]

## Sheet: Sheet1
Supplementary Table 7:	All weight values for the breast cancer models.
	4-mer Position 1					4-mer Position 2					4-mer Position 3					4-mer Position 4					RA	Bias Term
	Atchley Factor I	Atchley Factor II	Atchley Factor IIII	Atchley Factor IV	Atchley Factor V	Atchley Factor I	Atchley Factor II	Atchley Factor IIII	Atchley Factor IV	Atchley Factor V	Atchley Factor I	Atchley Factor II	Atchley Factor IIII	Atchley Factor IV	Atchley Factor V	Atchley Factor I	Atchley Factor II	Atchley Factor IIII	Atchley Factor IV	Atchley Factor V
No Holdouts	-1.13885	-2.60803	-2.89676	1.93301	-0.0298899	-0.627904	1.80637	-2.43401	-0.532607	-1.28642	4.57726	1.7917	1.73349	-4.61958	1.45804	4.96034	2.67952	-1.02758	-6.855	-0.518215	6.09912	-2.07
Holdout Patient
1 (BR01)	-0.576212	-2.61606	-3.17416	2.13838	0.342491	-1.04107	1.95694	-1.46095	-0.0576345	-2.38808	4.40453	2.06373	1.48719	-4.609	1.88366	5.20404	2.85259	-1.18016	-6.34559	0.0346588	6.02921	-2.48265
2 (BR05)	-1.74961	-2.44978	-2.04887	1.90978	-1.12121	-1.33762	1.69189	-1.70828	-0.134134	-2.29653	4.295	1.63496	1.71962	-4.35361	1.31871	5.19957	2.9202	-0.847244	-6.55263	-0.862887	5.96912	-3.04057
3 (BR07)	-1.27557	-2.48301	-2.97094	1.39308	0.107062	-0.607193	1.801	-1.64316	-0.27367	-1.81214	4.40743	1.87094	1.49373	-4.52302	1.47098	4.91771	2.58097	-1.12088	-6.29452	-0.327924	5.90071	-1.521
4 (BR13)	-0.992896	-2.5785	-3.4706	1.86408	0.560205	-0.776031	1.649	-1.70823	-0.033928	-1.9958	4.64992	1.84181	1.67697	-4.63085	1.66088	4.88337	2.55064	-1.33754	-6.73709	-0.273083	6.0305	-2.31933
5 (BR14)	-1.49825	-2.67114	-2.97342	1.39523	-0.054093	-0.85781	1.54534	-2.10493	-0.349571	-1.50951	4.55396	1.7326	1.57801	-4.60413	1.41424	4.64214	2.3505	-1.32193	-6.7948	-0.407126	5.88912	-1.95383
6 (BR15)	-1.76559	-2.55572	-3.21106	1.62819	-0.0542138	-1.59729	1.64497	-2.93427	-0.053542	-0.888548	3.93594	2.30903	1.48838	-4.21331	1.16998	4.51011	2.00921	-1.59431	-6.17525	0.0759916	6.00379	-2.17739
7 (BR16)	-1.20788	-2.64942	-3.14376	1.73711	0.205387	-1.10797	1.83356	-1.41685	-0.042235	-2.34463	4.68372	2.11208	1.58156	-4.49893	1.34906	5.19629	2.65552	-1.16692	-6.54641	-0.383652	6.04773	-2.44968
8 (BR17)	-1.43069	-2.66531	-3.21808	1.05357	0.646633	-1.00969	1.57244	-1.77274	0.266115	-1.9566	3.67512	1.91218	1.23156	-3.84034	1.41173	5.32929	2.71302	-1.0636	-6.14251	-0.488842	5.75518	-1.33661
9 (BR18)	-2.02808	-2.04157	-2.50652	1.38047	-0.112045	-1.10215	1.7925	-2.18585	0.00346191	-1.50756	4.50856	1.74633	1.73181	-3.9117	0.796508	4.96364	2.31142	-1.85884	-6.51729	0.283483	5.83073	-1.84416
10 (BR19)	-1.28293	-2.75243	-3.26312	1.63241	0.142099	-1.1008	1.84046	-1.6805	-0.127172	-2.12546	4.64849	2.0335	1.42119	-4.79015	1.60246	5.15784	2.67796	-1.45204	-6.88519	-0.147467	6.16503	-2.28612
11 (BR20)	-1.8979	-2.26671	-3.46246	1.49327	0.997302	-1.39722	1.61103	-1.83371	0.128887	-1.82646	3.95336	1.7165	1.44152	-4.16412	1.46565	4.96706	2.70593	-1.1971	-6.32175	-0.466356	5.77894	-2.2611
12 (BR21)	-1.04024	-2.49833	-2.34854	2.15614	-0.549438	-1.01819	1.74011	-2.27032	-0.0541462	-1.20491	3.98738	1.68084	1.36561	-4.27714	1.85707	5.30338	2.67744	-1.13708	-6.67017	-0.24792	5.8649	-2.64306
13 (BR22)	-1.32554	-2.64991	-3.32175	1.7499	0.532749	-1.29813	1.65076	-2.1258	-0.0241765	-1.71744	4.51216	2.03904	1.52195	-4.32254	1.4155	4.97564	2.55189	-1.3445	-6.76235	-0.231416	5.81789	-3.09653
14 (BR24)	-1.46492	-2.62902	-2.3848	2.14273	-0.945086	-1.12378	1.83781	-2.34871	-0.204066	-1.45822	4.23121	1.81959	1.54737	-4.48026	1.2916	4.97789	2.69339	-0.958643	-6.75135	-0.667868	6.13804	-2.34254
15 (BR25)	-2.00144	-2.5602	-3.57292	1.17861	0.291875	-1.26202	1.94383	-1.27192	0.41461	-1.94523	4.22665	2.48912	1.39883	-4.44927	0.90244	4.9363	2.40169	-1.9416	-5.46878	0.0667696	5.93817	-1.70814
16 (BR26)	-1.32056	-2.59812	-2.77286	1.79635	-0.193205	-0.889671	1.84396	-2.03274	-0.263682	-1.67277	4.50922	1.96268	1.74398	-4.43036	1.24108	4.93669	2.64547	-1.02508	-6.65671	-0.480119	6.02138	-2.18249
Mean	-1.42864	-2.54158	-2.99024	1.66558	0.0497824	-1.09542	1.74722	-1.90618	-0.0503052	-1.79062	4.32392	1.93531	1.52683	-4.38117	1.39072	5.00631	2.58112	-1.28422	-6.4764	-0.282735	5.94878	-2.22782
Standard Deviaion	0.392719	0.174644	0.45329	0.335932	0.563027	0.248588	0.127453	0.418636	0.195606	0.41416	0.300251	0.234055	0.143081	0.256293	0.291127	0.222819	0.223542	0.304174	0.352876	0.296892	0.122378	0.484329
Maximum	-0.576212	-2.04157	-2.04887	2.15614	0.997302	-0.607193	1.95694	-1.27192	0.41461	-0.888548	4.68372	2.48912	1.74398	-3.84034	1.88366	5.32929	2.9202	-0.847244	-5.46878	0.283483	6.16503	-1.33661
Minimum	-2.02808	-2.75243	-3.57292	1.05357	-1.12121	-1.59729	1.54534	-2.93427	-0.349571	-2.38808	3.67512	1.63496	1.23156	-4.79015	0.796508	4.51011	2.00921	-1.9416	-6.88519	-0.862887	5.75518	-3.09653
